# Supplementary material
Source: PubMed Central journal article supplement (PMC6493977)
Supplement: ASN.2018060668SupplementaryData.pdf [file ASN.2018060668SupplementaryData.pdf]

## Supplemental Material

### Fluconazole increases osmotic water transport in renal collecting duct through effects on aquaporin 2 trafficking

Tanja Vukićević<sup>1¶</sup>, Christian Hinze<sup>1,2,3¶</sup>, Sandrine Baltzer<sup>1</sup>, Nina Himmerkus<sup>4</sup>, Catarina Quintanova<sup>4</sup>, Kerstin Zühlke<sup>1</sup>, Friederike Compton<sup>2,3</sup>, Robert Ahlborn<sup>5</sup>, Alessandro Dema<sup>1</sup>, Jenny Eichhorst<sup>6</sup>, Burkhard Wiesner<sup>6</sup>, Markus Bleich<sup>4</sup>, Kai M. Schmidt-Ott<sup>1,2,3\*</sup> & Enno Klussmann<sup>1,7\*</sup>

<sup>¶</sup>These authors contributed equally to this work.

#### Affiliations

<sup>1</sup>Max Delbrück Center for Molecular Medicine Berlin (MDC), Germany

<sup>2</sup>Department of Nephrology and Medical Intensive Care, Charité - Universitätsmedizin Berlin, Germany.

<sup>3</sup>Berlin Institute of Health, Berlin, Germany.

<sup>4</sup>Department of Physiology, Christian Albrechts University Kiel, Germany

<sup>5</sup>Information Technology Department, Charité - Universitätsmedizin Berlin, Germany

<sup>6</sup>Leibniz-Forschungsinstitut für Molekulare Pharmakologie (FMP), Berlin, Germany

<sup>7</sup>DZHK (German Centre for Cardiovascular Research), partner site Berlin, Germany

**Running Title:** Fluconazole causes antidiuresis

#### \*Corresponding authors

Enno Klussmann  
Anchored Signaling  
Max Delbrück Center for Molecular  
Medicine (MDC)  
In the Helmholtz Association  
Robert-Rössle-Strasse 10  
13125 Berlin  
Germany  
Tel. +49 (0)30 9406 2596  
FAX. +49 (0)30 9406 2593  
[enno.klussmann@mdc-berlin.de](mailto:enno.klussmann@mdc-berlin.de)

Kai M. Schmidt-Ott  
Molecular and Translational Kidney  
Research  
Max Delbrück Center for Molecular  
Medicine (MDC)  
In the Helmholtz Association  
Robert-Rössle-Strasse 10  
13092 Berlin  
Germany  
Tel. +49 (0)30 9406 2512  
[Kai.schmidt-ott@mdc-berlin.de](mailto:Kai.schmidt-ott@mdc-berlin.de)

## Content

Supplemental Figure 1: Scheme showing animal treatment

Supplemental Figure 2 Supplemental Figure 2: Fluconazole does not affect (A) creatinine clearance, (B) water or (C) food intake of mice.

Supplemental Figure 3: (A) Without trans-epithelial osmotic gradient the application of 50  $\mu\text{M}$  fluconazole does not induce trans-epithelial water flow across epithelia of isolated CCDs. (B) Diameter of mouse CCDs during water flux measurements at a given osmotic gradient (300/150 mosm/kg) does not change in response to DMSO, fluconazole (50  $\mu\text{M}$ ) or forskolin (30  $\mu\text{M}$ ).

Supplemental Figure 4. Fluconazole does not alter AQP2 mRNA abundance in primary IMCD cells and mice

## Supplemental Figure 1

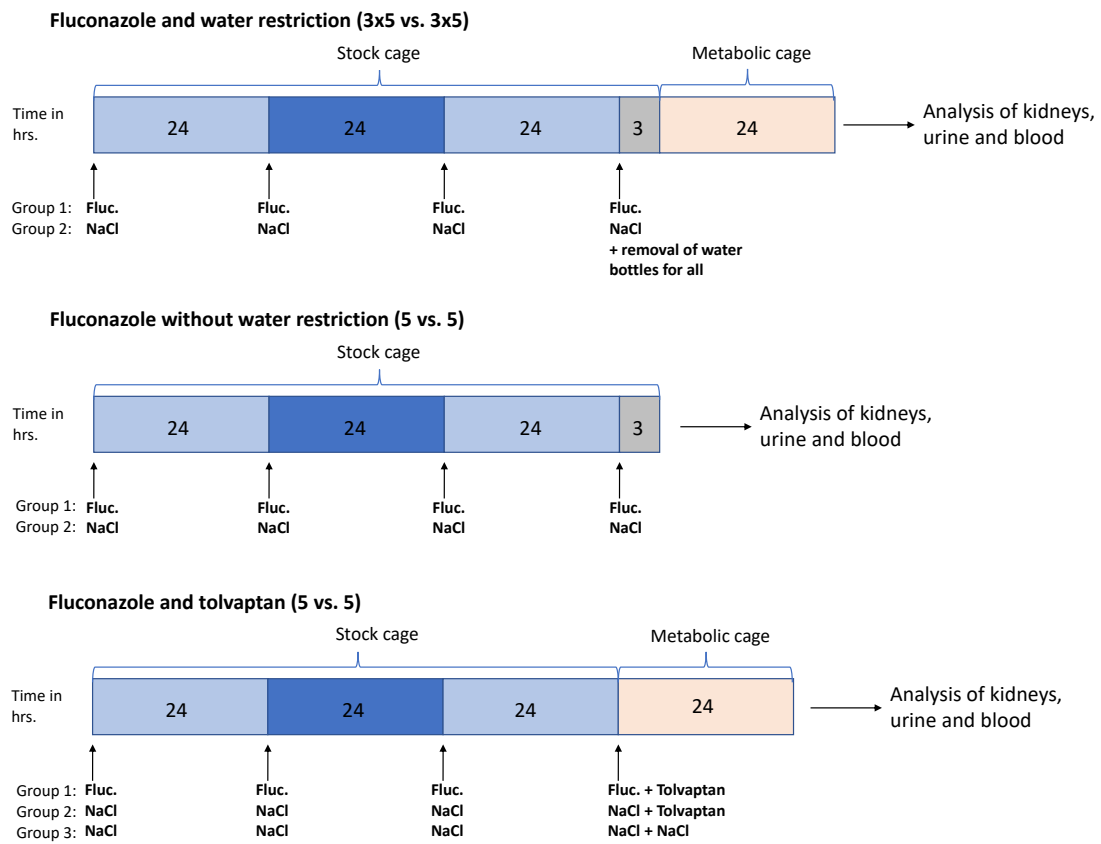

Supplemental Figure 1: Scheme depicting regimes of mouse treatments.

## Supplemental Figure 2

**A**

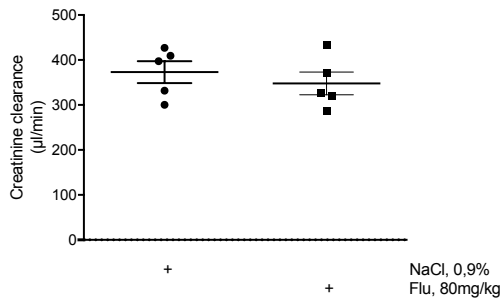

**B**

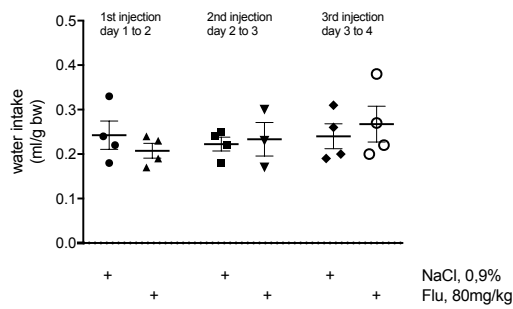

**C**

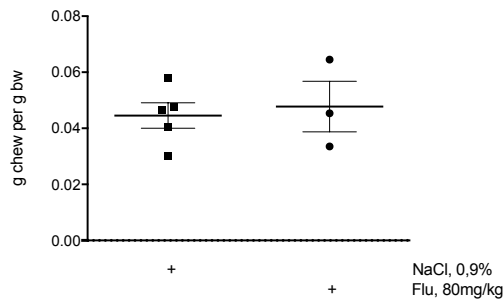

**Supplemental Figure 2: Fluconazole does not affect (A) creatinine clearance, (B) water or (C) food intake of mice.** The creatinine clearance in baseline male mice was calculated as a measure for the glomerular filtration rate (GFR) according to Dunn et al., 2004.<sup>17</sup>

### Supplemental Figure 3

A

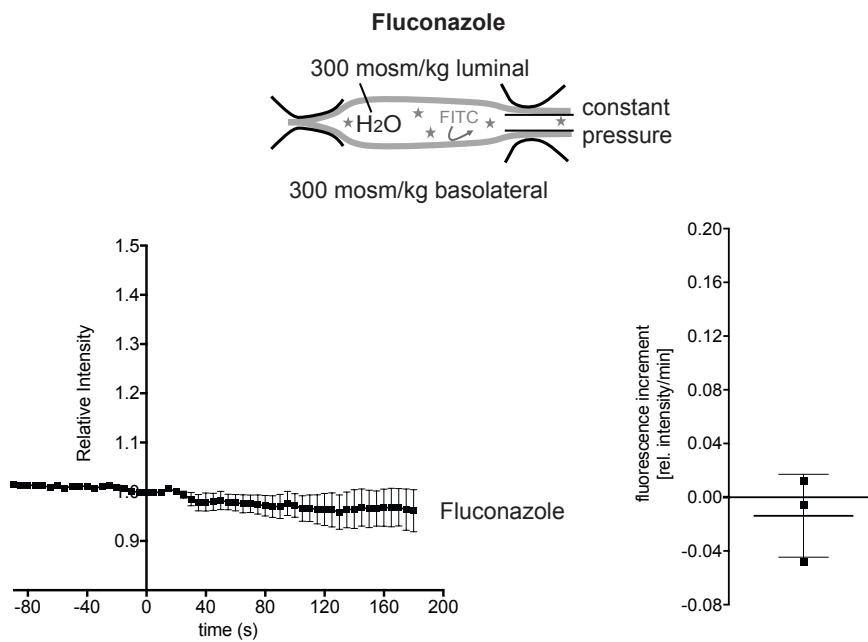

B

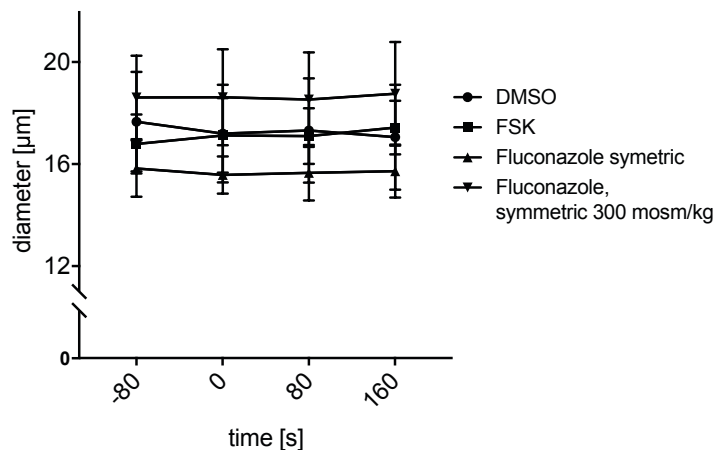

**Supplemental Figure 3. (A) Without trans-epithelial osmotic gradient the application of 50  $\mu\text{M}$  fluconazole does not induce trans-epithelial water flow across epithelia of isolated CCDs.** The scheme depicts the experimental setting; control solution with 300 mosm/kg (145 mM NaCl, 0.4 mM  $\text{KH}_2\text{PO}_4$ , 1.6 mM  $\text{K}_2\text{HPO}_4$ , 1 mM  $\text{MgCl}_2$ , 1.3 mM Ca-gluconate, 5 mM Glucose, pH 7.4) on both sides, luminally supplemented with 50  $\mu\text{M}$  150 kDa FITC dextran. Change of relative fluorescence intensity over time, application of basolateral 50  $\mu\text{M}$  fluconazole at time point 0s. Fluorescence increment values for  $n = 3$  CCD of 3 C57Bl6J mice (8 weeks). **(B) Diameter of mouse CCDs during water flux measurements at a given osmotic gradient (300/150 mosm/kg) does not change in response to DMSO, fluconazole (50  $\mu\text{M}$ ) or forskolin (30  $\mu\text{M}$ ).** Luminal diameters were taken at time point -80s, 0 s, 80s and 160s. There was no systematic change in the diameter over time or after applications of the agents.

## Supplemental Figure 4

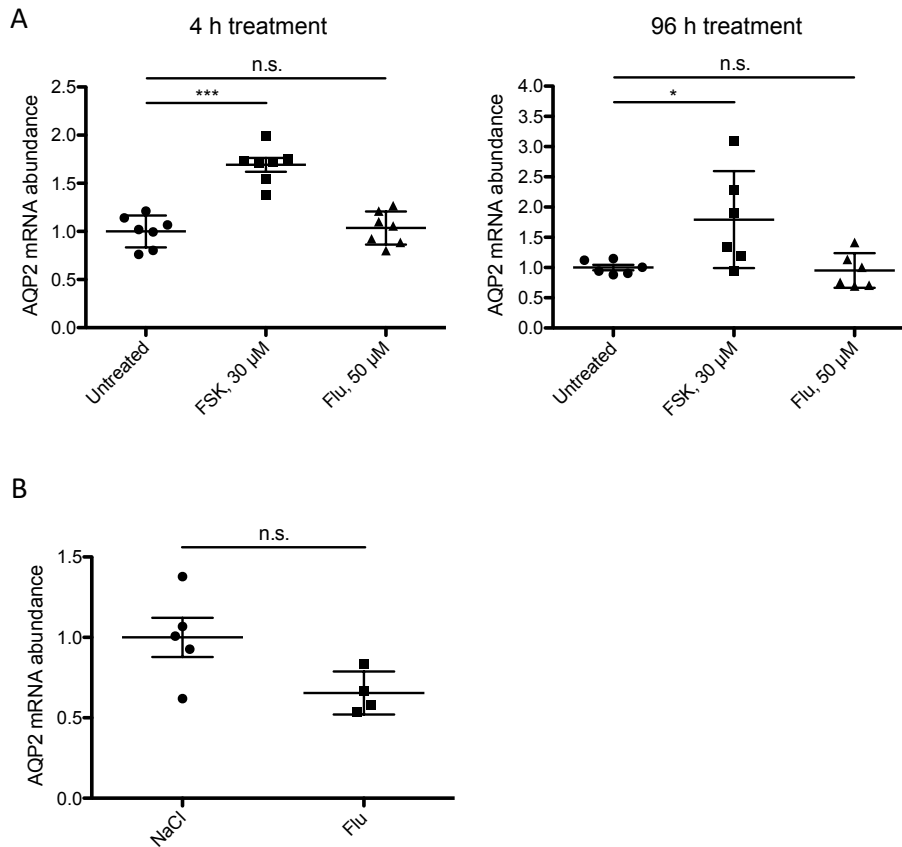

**Supplemental Figure 4. Fluconazole does not alter AQP2 mRNA abundance in primary IMCD cells and mouse kidney.** Semiquantitative analysis of the effects of forskolin and fluconazole on AQP2 mRNA levels. (A) IMCD cells were left untreated or stimulated with forskolin (FSK, 30  $\mu$ M) or fluconazole (Flu, 50  $\mu$ M) for 4 h or every 24 h over a period of 96 h. Relative levels of AQP2 mRNA were determined by real-time PCR. Shown are means  $\pm$  SEM of three independent experiments with duplicates each, \* $p=0.0169$ , \*\*\* $p<0.0001$ . (B) Non water-deprived mice were treated every 24 h over a period of 96 h with fluconazole (i.p. injections; 80 mg/kg) or with 0.9% NaCl. Whole kidney lysates were prepared and relative levels of AQP2 mRNA were determined by real-time PCR.  $n = 5$  animals per NaCl group and  $n = 4$  animals per fluconazole group (mean  $\pm$  SEM).
